1 **DSCN: double-target selection guided by CRISPR screening and**  
2 **network**

3 Enze Liu<sup>1,2,3</sup>, Xue Wu<sup>2</sup>, Lei Wang<sup>2</sup>, Yang Huo<sup>2,3</sup>, Huanmei Wu<sup>4</sup>, Lang Li<sup>2</sup>, and Lijun Cheng<sup>2\*</sup>

4  
5 <sup>1</sup>Division of Hematology and Oncology, School of Medicine, Indiana University, Indianapolis,  
6 Indiana, USA

7 <sup>2</sup>Department of Biomedical Informatics, College of Medicine, The Ohio State University,  
8 Columbus, Ohio, USA

9 <sup>3</sup>School of Informatics and Computing, Indiana University, Indianapolis, Indiana, USA

10 <sup>4</sup>College of Public Health, Temple University, Philadelphia, Pennsylvania, USA

11

12

13

14 \*Corresponding author:

15 Lijun Cheng, Ph.D.

16 Department of Biomedical Informatics, College of Medicine

17 The Ohio State University

18 340H Lincoln Tower, 1800 Cannon Drive

19 Columbus Ohio 43210

20 Telephone: (614) 366-4980

21 Email: Lijun.Cheng@osumc.edu

22

23 We declare no potential conflict of interest.

24

## 25 **Abstract**

26 Cancer is a complex disease with usually multiple disease mechanisms. Target combination  
27 is a better strategy than a single target in developing cancer therapies. However, target  
28 combinations are generally more difficult to be predicted. Current CRISPR-cas9 technology  
29 enables genome-wide screening for potential targets, but only a handful of genes have been  
30 screened as target combinations. Thus, an effective computational approach for selecting  
31 candidate target combinations is highly desirable. Selected target combinations also need to  
32 be translational between cell lines and cancer patients.

33 We have therefore developed **DSCN (double-target selection guided by CRISPR**  
34 **screening and network)**, a method that matches expression levels in patients and gene  
35 essentialities in cell lines through spectral-clustered protein-protein interaction (PPI) network.  
36 In DSCN, a sub-sampling approach is developed to model first-target knockdown and its  
37 impact on the PPI network, and it also facilitates the selection of a second target. Our analysis  
38 first demonstrated high correlation of the DSCN sub-sampling-based gene knockdown model  
39 and its predicted differential gene expressions using observed gene expression in 22  
40 pancreatic cell lines before and after MAP2K1 and MAP2K2 inhibition ( $R^2 = 0.75$ ). In our  
41 DSCN algorithm, various scoring schemes were evaluated. The 'diffusion-path' method  
42 showed the most significant statistical power of differentiating known synthetic lethal (SL)  
43 versus non-SL gene pairs ( $P = 0.001$ ) in pancreatic cancer. The superior performance of  
44 DSCN over existing network-based algorithms, such as OptiCon[1] and VIPER[2], in the  
45 selection of target combinations is attributable to its ability to calculate combinations for any

46 gene pairs, whereas other approaches focus on the combinations among optimized regulators  
47 in the network. DSCN's computational speed is also at least ten times faster than that of other  
48 methods. Finally, in applying DSCN to predict target combinations and drug combinations for  
49 individual samples (DSCNi), we showed high correlation of DSCNi predicted target  
50 combinations with synergistic drug combinations ( $P=1e-5$ ) in pancreatic cell lines. In summary,  
51 DSCN is a highly effective computational method for the selection of target combinations.

52

### 53 **Author Summary**

54 Cancer therapies require targets to function. Compared to single target, target combination is  
55 a better strategy for developing cancer therapies. However, predicting target combination is  
56 much complicated than predicting single target. Current CRISPR technology enables whole  
57 genome screening of potential targets. But most of the experiments have been conducted on  
58 single target (gene) level. To facilitate the prediction of target combinations, we developed  
59 DSCN (**double-target selection guided by CCRISPR screening and network**) that utilize  
60 single target-level CRISPR screening data and expression profiles for predicting target  
61 combinations by connecting cell-line omics-data with tissue omics-data. DSCN showed great  
62 accuracy on different cancer types and superior performance compared to existing network-  
63 based prediction tools. We also introduced DSCNi derived from DSCN and designed specific  
64 for predicting target combinations for single-patient. We showed synergistic target  
65 combinations predicted by DSCNi accurately reflected synergies on drug combination levels.  
66 Thus, DSCN and DSCNi have the potential be further applied in personalized medicine field.

67

## 68 **Introduction**

69 The complexity of cancer is widely recognized, with heterogeneous disease mechanisms  
70 underlying primary, metastatic, and drug-resistant tumors [3, 4]. Therefore, translational  
71 cancer research now focuses on the identification of combinational rather than single targets  
72 and the selection of drug combinations instead of single drugs [5, 6]. Synthetic lethality (SL),  
73 a key concept in the simultaneous targeting of two genes that contribute to tumor vulnerability  
74 [7], requires the loss of both genes in a pair to be lethal to a cancer cell. A CRISPR-based  
75 double knockout (CDKO) system has recently been developed to effectively screen gene pairs  
76 or target combinations [8, 9]. In this paper, we will use the terms gene pair and target  
77 combination interchangeably because they represent equivalent concepts. Screening using  
78 the CDKO system, however, is limited by the number of genes to be screened. For instance,  
79 if we screen target combinations among 100 genes, and each gene has four gRNAs, there  
80 will be  $(4 \times 100)^2/2 = 80,000$  combinations, a scale that is feasible in a CDKO system.  
81 However, across the genome, if we screen target combinations among 10,000 genes and  
82 select only one gRNA per gene, the resulting  $10,000^2/2 = 50,000,000$  combinations will be  
83 practically infeasible. Therefore, a computational approach is very much needed to rank and  
84 select top candidate gene pairs for CDKO analysis.

85

86 The many computational methods developed to identify potential candidate SL gene pairs fall  
87 into two major categories: machine learning and statistical inference. The machine-learning

88 approach has a much longer history, with the generation of large-scale double knockout data  
89 in yeast in 2004 [10]. Several methods, including multiple network decision tree [11], protein  
90 interaction network [12], and multi-network and multi-classifier [13] approaches, have  
91 demonstrated the significant predictive performance of SL gene pairs using features derived  
92 from network topology, gene ontology, and gene function sets. Recently, researchers applied  
93 a systems-biology framework called ‘mashup’ that allows for the acquisition and synthesis of  
94 data from diverse sources [14]. This method performed even better than the other network  
95 analyses in predicting SL gene pairs, further demonstrating the ability of such computational  
96 algorithms as random walk with restart to integrate and characterize the biological network  
97 topology successfully. Group-sparse collective matrix factorization (gCMF), another unique  
98 machine-learning method and recent major contribution to SL prediction [15], performed  
99 matrix factorizations among input data, such as gene expression, mutations, copy number  
100 variations (CNV), and CDKO, and identified a shared sub-matrix in which SL gene pairs can  
101 be predicted. Its performance was comparable to that of the mashup approach in several  
102 CDKO datasets derived from human cancer cell lines.

103

104 Statistical inference, on the other hand, relies on strong biological assumptions regarding the  
105 mechanisms of synthetic lethality. These methods infer SL gene pairs utilizing multi-omics  
106 data, such as CNV, mutations, gene expression, and single gene essentiality generated from  
107 CRISPR screening. In particular, CDKO data are NOT employed to train SL prediction in the  
108 statistical inference. DAISY is a notable early SL inference method [16], in which one primary

109 assumption is that if the cancer cell is viable, the SL pair comprises one gene that is both  
110 active and essential if the other is inactive. MiSL (mining synthetic lethals), another statistical-  
111 inference approach [17], assumes that if one gene in an SL gene pair is inactive, the other  
112 must be active, and its activity is demonstrated through concordant changes in CNV and gene  
113 expression. Several other methods, such as ISLE (identification of clinically relevant synthetic  
114 lethality) [18], DiscoverSL [19], and ASTER (analysis of synthetic lethality by comparison  
115 with tissue-specific disease-free genomic and transcriptomic data) [20] were developed  
116 similarly, each making different biological assumptions regarding SL gene pairs.

117

118 Considering network topology, recent systems-biology-based statistical inference methods  
119 differed significantly from the other established SL statistical-inference methods. Here, we  
120 highlight two notable approaches, OptiCon (optimal control nodes) [1] and VIPER (virtual  
121 inference of protein activity by enriched regulon analysis) [2]. Both approaches primarily utilize  
122 gene-expression data to construct a biological network and rank and select target  
123 combinations that demonstrate optimal control of the network. OptiCon relies on a protein-  
124 protein interaction (PPI) network and models both signaling transduction and gene regulation  
125 during the selection of target combinations, and VIPER focuses on a gene-regulatory network  
126 model derived from mutual information among genes. Both approaches assume that the more  
127 a combination of two gene targets controls the network, the more likely those targets will be  
128 an SL pair.

129

130 Both statistical inference and machine learning have their advantages and disadvantages. A

131 machine-learning approach optimizes prediction based on training data, but the quantity of  
132 training data limits the validity of its prediction of SL gene pairs. Extrapolation of the SL gene  
133 pairs from machine-learning prediction to other pathways will be challenging because most  
134 CDKO data generated from human cancer cells are sparse and biased toward several specific  
135 pathways. However, the prediction of genome-wide SL gene pairs using statistical-learning  
136 approaches relies strongly on biological assumptions and is technically unbiased. This can be  
137 particularly useful in the case of very limited CDKO data.

138

139 In this paper, we describe a new statistical inference method we have developed called DSCN  
140 (double target selection guided by CRISPR screening and network). It more resembles  
141 OptiCon and VIPER than other methods, such as DAISY or MiSL. Similar to OptiCon and  
142 VIPER, DSCN is built upon a biological network and transcriptome data, and the top  
143 combination targets are ranked and selected based on their control of or impact on the network.

144

145 DSCN differs from OptiCon and VIPER in its use of single-gene-library-based CRISPR-cas9  
146 screening data, its focus on the overlapped networks between the cancer cell line and the  
147 corresponding primary tumor data, and most important, its consideration of the sequential  
148 selection of two targets, which involves the perturbation of transcriptome data for selection of  
149 the second target after selection of the first. This third model strategy, we believe, will make  
150 the selection of combination targets by DSCN more closely resemble the true biology. DSCN  
151 is also built upon our early research in the selection of single targets, SCNrank (spectral  
152 clustering for network-based ranking) [21], which ranks and selects consensus single-gene

153 targets between cancer cell lines and tumor samples.

154

## 155 **Materials and Methods**

### 156 **Table 1. Datasets used in this study**

157

158 **Tables 1** details our data sources, including the types of cancer screened, data platforms and  
159 types, and sample numbers. We retrieved gene-expression and -mutation data for normal  
160 tissue and tumor samples for pancreatic and breast cancers from the Gene Expression  
161 Omnibus (GEO) [22, 23] and The Cancer Genome Atlas (TCGA) [24] and gene-expression  
162 and -essentiality data from the Cancer Cell Line Encyclopedia (CCLE) [13] and Project Achilles  
163 [25-27], downloaded PPI data from STRING [28], extracted drug-target data from DrugBank  
164 [12], and downloaded synthetic lethal gene-pair data from the SynlethDB database [29] and  
165 drug-sensitivity data from the DrugComb database [30].

166

### 167 **Steps of DSCN algorithm**

168 DSCN algorithm consists of six steps (**Figure 1**):

169

### 170 **Figure 1. Overview of double-target selection guided by CRISPR screening and network** 171 **(DSCN)**

172

#### 173 **Step 1: Network construction**

174 In this step, we construct two integrated function networks, a tissue network  $G_t$  and a cell-line  
175 network  $G_c$ .  $G_t$  consists of a skeleton from the STRING PPI network and edge weights from



176 gene pair-wise Pearson correlations in tumor samples, and node weights are the fold changes  
177 in gene expression between tumors and normal tissue. A high fold change indicates higher  
178 gene expression in the tumor than in normal tissue. Assume that there are a total of  $n$  genes  
179 (nodes) in  $G_t$ . The affinity matrix  $S_t$  denotes the edge weights, and diagonal matrix  $D_t$   
180 denotes the node weights in Equation (1):

$$181 \quad G_t = S_t + D_t, \quad S_t = \begin{pmatrix} 0 & \cdots & w_{1n} \\ \vdots & \ddots & \vdots \\ w_{n1} & \cdots & 0 \end{pmatrix}, \quad D_t = \begin{pmatrix} w_1 & \cdots & 0 \\ \vdots & \ddots & \vdots \\ 0 & \cdots & w_n \end{pmatrix}, \quad (1)$$

182 where  $w_{ab}$ ,  $a \neq b \in (1, n)$  in  $S_t$  indicates the edge weight (correlation) between genes  $a$  and  
183  $b$  in the tissue network; and  $w_i$  in  $D_t$  is the tumor versus normal fold change in the expression  
184 of gene  $i$ ,  $i = 1, \dots, n$ .

185 Similarly,  $G_c$  consists of an identical skeleton from the same STRING PPI network and edge  
186 weights from pair-wise gene correlations in cell-line samples. Unlike  $G_t$ , the node weight of  
187  $G_c$  is from CRISPR-Cas9 screening data, which is indicated as the gene essentiality value.  
188 The gene essentiality value can be generally interpreted as the fold change in cell count before  
189 and after gene knockout. Genes demonstrating smaller fold change are more essential. In this  
190 study, all the essentiality values are log2 transformed. Similarly,  $G_c$  is decomposed into  
191 affinity matrix  $S_c$  for edge weight and diagonal matrix  $D_c$  for node weight in the cell-line  
192 network  $G_c = S_c + D_c$ .

### 193 Step 2: Construction of Laplacian matrices for the tissue and cell-line networks

194 A Laplacian matrix measures all properties of a network, including node weight, edge weight,  
195 and connectivity. In this second step, we construct Laplacian matrices for the tissue network  
196  $G_t$  and cell-line network  $G_c$  as:

197 
$$L = D - S, \quad (2)$$

198 in which  $D$  is the diagonal matrix and  $S$ , the affinity matrix, defined in Equation (1), and  $L_t$  is  
199 the Laplacian matrix for the tissue network and  $L_c$ , that for the cell-line network.

200

201 Step 3: Spectral clustering for tissue network

202 We perform spectral clustering only on the Laplacian matrix of the tissue network  $L_t$  as:

203 I. Normalize the Laplacian matrix  $L_t$  to  $L'_t$ :

204 
$$L'_t = \begin{pmatrix} w_1 & \cdots & -\frac{abs(w_{1n}w_1)}{\sum_{k=1}^n abs(w_{1k})} \\ \vdots & \ddots & \vdots \\ -\frac{abs(w_{n1}w_1)}{\sum_{k=1}^n abs(w_{nk})} & \cdots & w_n \end{pmatrix} \quad (3)$$

205 In the normalized Laplacian matrix  $L'_t$ , all diagonal elements are positive, and all other  
206 elements are negative. The row sum of non-diagonal elements is equal to its corresponding  
207 diagonal.

208 II. Perform eigen decomposition for matrix  $L'$  to obtain the spectrum  $E = \{\lambda_1, \lambda_2 \dots \lambda_n\}$ , where  
209  $0 = \lambda_1 \leq \lambda_2 \leq \dots \leq \lambda_n$ , and their corresponding eigenvector.

210 III. Choose the  $k$  smallest non-negative eigenvalues  $\{\lambda_i, \dots, \lambda_{i+k}\}$  and their corresponding  
211 eigenvectors, and combine these  $k$  eigenvectors into an  $n \times k$  matrix,  $H$ .

212 IV. In this  $H$  eigenvector matrix, each row represents a gene node, and  $k$  columns  
213 represent the coordinate values of a gene node. The row vectors in  $H$  are used to calculate  
214 the Euclidean distance between a pair of gene nodes. We then perform K-means clustering  
215 for  $n$  nodes. To select the number of clusters,  $K'$ , to produce a good fit, we calculate

216 Hartigan's number, which measures the quality of clustering results. We select the optimal  $K'$   
217 and constrain it further to less than 10 for practical consideration. This spectral clustering leads  
218 to  $K'$  exclusive clusters (i.e., subnetworks). From the tissue network  $G_t$ , subnetworks  $g_{t1}, \dots, g_{tK'}$   
219 are classified.

220

#### 221 Step 4: Mapping the tissue/cell-line network and calculating the impact score of Target 1

222 The cell-line network  $G_c$  is then mapped to the spectral clusters,  $g_{t1}, \dots, g_{tK'}$ , generated from  
223 tissue network  $G_t$  in Step 3. Because tissue network  $G_t$  and cell-line network  $G_c$  share the  
224 identical network structure, i.e., nodes and connections,  $G_t$  subnetworks,  $\{g_{t1}, \dots, g_{tK'}\}$  are  
225 mapped to  $G_c$  subnetworks  $\{g_{c1}, \dots, g_{cK'}\}$  using their common node names and connections.

226

227 The target impact score will be calculated based on the cell-line subnetworks  $\{g_{c1}, \dots, g_{cK'}\}$ . We  
228 focus on all Food and Drug Administration (FDA)-approved drug targets (see **Table 1**) to  
229 calculate our target score. The impact score of a target 1 ( $T_1$ ) is calculated as the sum of the  
230 impact score itself and its impact on the rest of the genes in the network. Its general form is  
231 defined in Equation (4):

$$232 \quad IS(T_1) = S(T_1) + \sum_{i \in \{1, \dots, n\}} S[N_i | Pa(N_i)], \quad (4)$$

233

234 in which,  $\{N_i, i = 1, \dots, n\}$  are the gene nodes in the network other than  $T_1$ , and  $Pa(N_i)$  is a set  
235 of parent nodes of  $N_i$ . In particular, the impact score on  $N_i$  depends on its parent nodes,  $Pa$   
236 ( $N_i$ ). **Figure 2** illustrates the three different methods of calculating the impact score—the most-  
237 probable, random-walk, and diffusion paths.

238 Most-probable path: The immediate children of  $T1$  are the gene nodes directly connected to  
239  $T1$ , e.g.,  $N4$  is the direct child  $T1$  in **Figure 2b**. In this method, we will count only the immediate  
240 children of  $T1$  in calculating the impact score. Without loss of generality, let  $ch(T1)$  be the  
241 set of immediate children of  $T1$ . The most probable path of  $T1$  is the one that has the smallest  
242 impact score among  $ch(T1)$ . Based on the general impact score as calculated in Equation  
243 (4), the most-probable-path impact score is defined in Equation (5):

$$\begin{aligned} 244 \quad IS(T1) &= S(T1) + \min_{N_i \in ch(T1)} S[N_i | T1] \\ 245 \quad &= w_{T1} + \min_{N_i \in ch(T1)} (w_{N_i} \times w_{T1, N_i}), \end{aligned} \quad (5)$$

246 where  $w_{T1}$  and  $w_{N_i}$  indicate their node weights, and  $w_{T1, N_i}$  indicates their edge weight.

247

248 **Figure 2. Network configurations for three methods to calculate impact score**

249

250 Random walk path: The random-walk score is calculated in two steps. Step 1 is a random  
251 walk in the network, in which the random walk has a transition probability of traveling from one  
252 node to another. In **Figure 2c**, starting from  $T1$ , each node  $N_i$  is randomly visited. Here we  
253 used normalized edge weight for transition probability as defined in Equation (6):

$$254 \quad P_{j,i} = \frac{w_{j,i}}{\sum_{x \in e} w_{j,x}}, \quad (6)$$

255 where  $P_{j,i}$  is the transition probability from  $N_j$  to  $N_i$ ,  $w_{j,i}$  is the edge weight between them,  
256 and  $\sum_{x \in e} w_{j,x}$  is the sum of all edge weights of  $N_j$ . In this Markov process, a node can be  
257 visited multiple times. We set the total number of random-walk steps as  $2n$ , where  $n$  is the  
258 total number of nodes in the network.

259

260 Then, in Step 2, we defined the parent node as the node that visited  $N_i$  first, i.e.,  $Pa(N_i)$ .

261 Hence, the impact score of  $T1$  becomes:

$$\begin{aligned}
 262 \quad IS(T1) &= S(T1) + \sum_{i \in \{1, \dots, n\}} S[N_i | Pa(N_i)] \\
 263 \quad &= S(T1) + \sum_{i \in \{1, \dots, n\}} w_i \times w_{i, Pa(N_i)}. \quad (7)
 \end{aligned}$$

264

265 Diffusion path: Starting from  $T1$ , each node is visited in a hierarchical order. Therefore, the  
 266 parent nodes of a node,  $N_i$ , can be from the upper tier, i.e.,  $UpperTier(N_i)$ , or the same tier,  
 267 i.e.,  $SameTier(N_i)$ . For instance, in **Figure 2d**, there are four tiers in the hierarchical structure  
 268 starting from  $T1$ . The impact of  $T1$  transmits from Tier 1 to Tier 4 in the network. Therefore,  
 269 the impact score is defined in Equation (8):

$$\begin{aligned}
 270 \quad IS(T1) &= S(T1) + \sum_{i \in \{1, \dots, n\}} S[N_i | Pa(N_i)] \\
 271 \quad &= S(T1) + \sum_{i \in \{1, \dots, n\}} \{ \sum_{j \in UpperTier} W_{ij} W_i + \sum_{w \in SameTier} W_{iw} W_i \} \quad (8)
 \end{aligned}$$

272

### 273 Step 5: Subsampling and Target 2 ( $T2$ ) score and selection

274 Once  $T1$  is selected, we remove cancer cell lines with higher expression of the  $T1$  than its  
 275 sample mean and only keep cell lines with its expression lower than mean. This subsampling  
 276 method characterizes the knockdown of the  $T1$ . Similarly, we also remove cancer cell lines  
 277 with higher  $T1$  essentiality scores than the sample in our subsampling. After the resampling,  
 278 we construct the cell-line network  $G_c$  as Equation (2) using the subsampled cell-line  
 279 subsamples. We follow the same **Step 3** in mapping  $G_c$  to  $\{g_{t_1}, \dots, g_{t_{K'}}\}$  and calculate the  $T2$   
 280 impact score following the same algorithms defined in **Step 4**. The  $T2$  impact score is then  
 281 denoted as  $IS(T2|T1)$ , because the subsampling and network depend on  $T1$ .

282

283 Step 6: Calculation of impact score for target combinations

284 Because  $T1$  and  $T2$  and their impact scores are computed sequentially, the combinational  
 285 impact score will consider both sequential orders in Equation (9), in which  $T1 \neq T2$ :

286 
$$IS(T1, T2) = IS(T1) + IS(T2 | T1) \quad (9)$$

287 Tissue cell-line subnetwork similarity measure

288 We measure the similarity of each subnetwork pair  $\langle g_{t_i}, g_{c_i} \rangle$ ,  $i \in (1, \dots, K')$  between tissue and  
 289 cell-line using the following scheme:

290 I. Normalization of node weight (diagonal)

291 To make two subnetworks,  $g_{t_i}$  and  $g_{c_i}$ , comparable, we normalize the cell-line diagonal matrix  
 292  $D_{c_i}$  according to the tissue diagonal matrix  $D_{t_i}$  using the following formula:

293 
$$D'_{c_i} = \begin{pmatrix} \frac{w_{c,i,1} \sum_{j=1}^J w_{t,i,j}}{\sum_{j=1}^J w_{c,i,j}} & \dots & 0 \\ \vdots & \ddots & \vdots \\ 0 & \dots & \frac{w_{c,i,J} \sum_{j=1}^J w_{t,i,j}}{\sum_{j=1}^J w_{c,i,j}} \end{pmatrix}, \quad (10)$$

294 in which  $w_{c,i,j}$  denotes the node weight  $j \in (1, J)$  in the cell-line subnetwork, and  $w_{t,i,j}$ , that in  
 295 the tissue subnetwork.  $J$  is the total number of nodes in  $g_{c_i}$  and  $g_{t_i}$ .

296

297 II. Normalization of edge weight

298 The Laplacian matrices for each subnetwork pair,  $\langle g_{t_i}, g_{c_i} \rangle$ ,  $i \in (1, K')$ , are defined similarly as  
 299 Equation (3):  $L_{t_i} = D_{t_i} - S_{t_i}$  and  $L_{c_i} = D'_{c_i} - S_{c_i}$ . After node-weight normalization, trace ( $L_{c_i}$ )  
 300 = trace ( $L_{t_i}$ ). Then, their edge weights (non-diagonal elements) are normalized accordingly  
 301 using the formula:

$$L'' = \begin{pmatrix} w_1 & \dots & \frac{w_1 \text{abs}(w_1)}{\sum_{j=1}^J \text{abs}(w_{1j})} \\ \vdots & \ddots & \vdots \\ \frac{w_{j1} \text{abs}(w_{1j})}{\sum_{j=1}^J \text{abs}(w_{jj})} & \dots & w_j \end{pmatrix}. \quad (11)$$

302  
303 Until this step, all edges (non-diagonal elements) in both Laplacian matrices,  $L''_{t_i}$  and  $L''_{c_i}$ ,  
304 acquired node features during normalization. We keep the original directions (positive or  
305 negative) of node weights and edge weights for the following distance calculation.

306

### 307 III. Distance calculation

308 For two corresponding subnetworks  $g_{t_i}$  and  $g_{c_i}$  in tissue and cell-line, we calculate the  
309 distance using their normalized Laplacian matrices  $L''_{t_i}$  and  $L''_{c_i}$ :

$$310 \quad \text{Distance}(g_{t_i}, g_{c_i}) = \sum_{j=1}^J \sum_{l=1}^J (L''_{t_i}(j,l) - L''_{c_i}(j,l))^2, \quad l \neq j, \quad (12)$$

311 where  $L''(i,j)$   $i \neq j$  indicates the edge weight between nodes  $i$  and  $j$  in a given Laplacian  
312 matrix, and  $(L''_{t_i}(i,j) - L''_{c_i}(i,j))^2$  indicate the Euclidean distance between the same edges  
313 in two Laplacian matrices.

314

### 315 Construction of a DSCN algorithm for an individual cancer cell-line sample (DSCNi)

316 We apply DSCNi algorithm for scoring target combinations in a single cancer cellline for a  
317 single patient. Very similar to DSCN, in building up  $G_c$ , DSCNi relies on a set of expression  
318 profiles for a cancer cell line to calculate the edge weights (i.e., correlations) between gene  
319 nodes. However, unlike DSCN, DSCNi uses a cell-line-specific essentiality score for node  
320 weights. Its impact score calculation for  $T1$ ,  $IS(T1)$ , follows exactly from **Steps 1, 2, 3, and**  
321 **4**. In modeling the knockdown of  $T1$  in the subsampling in **Step 5**, we maintain the same  $T1$   
322 subsampling as DSCN, i.e., we remove samples with higher expression of  $T1$  than its sample

323 mean. However, we will keep the same essentiality score for this individual cancer cell-line  
324 sample to calculate the Target 2 impact score. We calculate the final combination target impact  
325 score similarly as in DSCN, such that it has a comparable meaning to that calculated from  
326 DSCN.

327

### 328 **Analysis of association between drug- and target-combination synergy**

329 The Bliss score [32] measures the synergistic effect of a drug combination, i.e., the effect of  
330 the drug combination on cell viability rather than the additive effects of its two component  
331 drugs. A two-drug combination is considered synergistic if its Bliss score exceeds 0.12 [33].  
332 On the other hand, the target combination is predicted to be synergistic if the impact score of  
333 the drugs in combination is larger than the additive score of the constituent drugs, as in  
334 Equation (13), in which the impact scores of  $IS(T1,T2)$ ,  $IS(T1)$  and  $IS(T2)$  are calculated by  
335 (9) and (8):

$$336 \quad IS(T1,T2) > IS(T1) + IS(T2) \quad (13)$$

337

338 In this section, we will define an association analysis between drug-combination scores and  
339 target-combination synergy scores. Consider a cancer cell line screened by a set of drug  
340 combinations, and these drug combinations can be categorized as either synergistic or non-  
341 synergistic based on their Bliss scores. Then, for each drug combination, we identify all its  
342 two-target combinations, calculate their synergy scores, and classify the drug combinations  
343 as either synergistic or not as in Equation (13). In a 2 by 2 contingency table, the rows are  
344 drug synergy (Y/N), and columns are target synergy (Y/N). For each drug combination, all



345 counts of target-combination synergy and non-synergy are added to the corresponding row  
346 with respect to drug-combination synergy or non-synergy. The association between drug- and  
347 target-combination synergy is tested using a Chi-square test.

348

349

## 350 **Results**

### 351 **Validation of the subsampling scheme for determining the impact of target-gene** 352 **knockdown in the DSCN algorithm**

353 In the DSCN algorithm, we designed our subsampling method (**Step 5**) to model the impact  
354 of Target 1 knockdown in the cancer cell line. To demonstrate the validity of this sampling  
355 scheme, we identified a GEO dataset, GSE45757, that provided transcriptome profiles across  
356 22 pancreatic cell lines before and after MAP2K1 and MAP2K2 inhibition. Our analysis  
357 focused on 1,301 neighbor genes of MAP2K1 and MAP2K2 in the PPI network. Using the  
358 subsampling approach, we calculated the log-fold changes in these 1,301 genes between  
359 groups with either high or low expression of MAP2K1 and MAP2K2 group, which represent  
360 the predicted impact of Target 1 knockdown in the subsampling scheme. On the other hand,  
361 the observed log-fold changes in these 1,301 gene expressions were calculated during  
362 MAP2K1 and MAP2K2 inhibition. **Figure 3** shows a strong correlation,  $R^2 = 0.75$ , between the  
363 predicted and observed fold changes among these 1,301 neighbor genes of MAP2K1 and  
364 MAP2K2. Findings of this analysis strongly support subsampling as a valid model for  
365 determining the impact of target-gene knockdown.

366

367 **Figure 3.** Correlation between the predicted and observed log-fold changes in gene  
368 expression among MAP2K1 and MAP2K2 neighbor genes in the protein-protein interaction  
369 (PPI) network

370

371

372 **Comparison of impact scores of target combinations using known synthetic lethal gene**  
373 **pairs in pancreatic cancers**

374 We proposed three different scoring schemes to model the impact of target-gene knockdown  
375 on the network—those of the most-probable, random-walk, and diffusion paths. In addition, the  
376 impact score can be calculated based on either the global or local PPI network. The local PPI  
377 network is the product from spectral clustering of the whole genome PPI network (global  
378 network). To compare the performance of these impact scores, we used the 23 reported  
379 synthetic lethal pancreatic gene pairs in SynlethDB [29] as benchmarks. We compared impact  
380 scores between them and the other 164 gene pairs, which were derived from 21 unique genes  
381 among the 23 SL gene pairs. We constructed a tissue-function network using 153 tumor and  
382 58 normal expression profiles of the pancreas from the GEO database (**Table 1**) and a cell-  
383 line function network using CRISPR screening data of 26 pancreatic cell lines from Project  
384 Achilles and 92 pancreatic tumor cell-line expression profiles from the GEO database (**Table**  
385 **1**). All expression profiles are generated by Affymetrix U1332.0 microarray.

386

387 Smaller impact scores indicated the stronger impact of the gene knockdown on the network.  
388 Calculation of the impact scores using the local network generated from spectral clustering  
389 revealed significant difference in diffusion-path-based impact scores (IS) between synthetic  
390 and non-synthetic lethal gene pairs (*P*-values) as well as lower impact scores of synthetic than

391 non-synthetic lethal gene pairs. We observed the same trends with the other two impact  
392 scoring schemes, the most-probable and random-walk paths, i.e., lower IS score in the  
393 synthetic than non-synthetic lethal gene pairs that were not statistically significant.

394

395 Calculation of the impact scores using the global network and diffusion-path scoring scheme  
396 also yielded lower diffusion impact scores in the synthetic than non-synthetic gene pairs,  
397 though the differences were not statistically significant. The scores of the most-probable and  
398 random-walk paths, on the other hand, showed the reverse direction between synthetic and  
399 non-synthetic gene pairs. We therefore believe that using the diffusion-path and local networks,  
400 evaluation of the target-combination impact score is an ideal approach in selecting synthetic  
401 lethal gene pairs.

402

403

404 **Figure 4. Comparison of target-combination impact scores using synthetic versus non-**  
405 **synthetic lethal gene pairs in pancreatic cancer.**

406

407

#### 408 **Compare the selection of target combinations among DSCN, OptiCon, and VIPER**

409 We compared the performance of DSCN with that of two existing algorithms for the selection  
410 of target combinations—OptiCon and VIPER. Both of these use transcriptome profiles to select  
411 combination targets, and their top target combinations are master regulators of synergy that  
412 have optimal control of their corresponding networks. OptiCon requires tumor transcriptome  
413 profiles and corresponding mutation data as input to infer master regulators and predict  
414 synergies among them, whereas VIPER uses transcriptome profiles from both tumor and  
415 normal samples to select regulons and infers synergies among the regulons. Because the

416 pancreas microarray expression profile used in the previous section has no corresponding  
417 mutation information, we utilized pancreatic expression profiles in TCGA to construct a tissue  
418 function network. We used 179 pancreatic tumor expression profiles along with their mutation  
419 data and 41 adjacent normal expression profiles (Table 1). We also used expression profiles  
420 of 92 pancreatic tumor cell lines from GEO and CRISPR-screening data of 26 pancreatic cell  
421 lines from Project Achilles (Table 1). Together, these data served for benchmark comparison  
422 of the performance of the three algorithms.

423

424 In total, DSCN predicted 37,275 synergistic target combinations, OptiCon, 2,778 , and VIPER,  
425 191. After mapping them onto all 12,821 synthetic lethal gene pairs within SynlethDB, neither  
426 OptiCon nor VIPER showed any overlap. However, DSCN demonstrated overlap of 936 target  
427 combinations. Among the 936 overlapped SL pairs, 79 were annotated as SL pairs specific to  
428 pancreatic ductal adenocarcinoma (PDAC). Of these 79, their predicted IS scores showed a  
429 0.34 Spearman correlation with their SynlethDB score ( $P < 0.01$ ), and the predicted IS scores  
430 were significantly lower than that of 6,162 random combinations on t-test ( $P = 0.05$ ). These  
431 6,162 random combinations were derived from genes in the 79 SL pairs, but 79 were removed.

432

433 These benchmark comparison analyses were performed on Indiana University's  
434 supercomputer, 'Carbonate'. DSCN completed its search of target combinations on the single  
435 central processing unit core in 12 hours, a significantly faster speed than those using OptiCon  
436 (320 hours) and VIPER (141 hours). OptiCon mainly performs two computational tasks,  
437 calculating subnetworks and null distributions, each of which uses about 160 hours. Most of

438 the computational time of VIPER, on the other hand, involves the generation of the  
439 transcriptome mutual information network using ARACNe [34], a classical tool of  
440 reconstructing regulatory network by calculating pair-wise mutual information between genes.

441

442 **Top-ranked target combinations and their associations with overall survival in patients**  
443 **with pancreatic cancer**

444

445 We used expression profiles of tissues and cell lines from the GEO database (**Table 1**) to  
446 construct function networks and predict impact scores. Our dataset consisted of expression  
447 profiles of 153 tumors and 58 normal pancreas samples from GEO, CRISPR-screening data  
448 of 26 pancreatic cell lines from Project Achilles, and 92 pancreatic tumor cell-line expression  
449 profiles from the GEO database. This yielded 14,066 overlapped genes.

450

451 In this analysis, we focused on 1,437 drug targets of all FDA approved drugs in DrugBank and  
452 calculated their possible target combinations. Most interestingly, all genes in the top 230 target  
453 combinations are within the same subnetwork—the PDAC tissue subnetwork (**Supplementary**  
454 **Figure 1 A**) and cell-line subnetwork (**Supplementary Figure 1 B**). **Supplementary File 1**  
455 includes the full list of genes in this subnetwork.

456

457 **Figure 5. Kaplan-Meier curves for the nine top-ranked target combinations.**

458

459 **Table 2** displays the nine top-ranked target combinations and their annotations. Their Kaplan-

460 Meier curves (**Figure 5**) are generated using TCGA PDAC clinical annotations from the Gene  
461 Expression Profiling Interactive Analysis (GEPIA) database [35]. Patient samples are  
462 categorized into two groups based on a target combination in which both genes are expressed  
463 either above (i.e., high-2) or below their means (i.e., low-2). Using log-rank test and Cox  
464 proportional hazard model to analyze the association between the expression of a target  
465 combination (high-2 versus low-2) and overall survival of patients with PDAC, we observed  
466 significant survival difference ( $P < 0.05$ , Table 2) of three of the nine top-ranked target  
467 combination comparisons, (EGLN1, TRFC), (FRK, TRFC), and (XDH, TRFC), their overall  
468 survival was worse for patients with high expression of these two genes than those with low  
469 expression.

470

471 Interestingly, seven of the top nine target combinations include transferrin receptor (TFRC),  
472 which encodes a surface receptor responsible for cellular iron intake. High expression of TFRC  
473 in PDAC and its strong association with PDAC growth and survival have been reported [36].  
474 Recent studies suggest several key pathways of ferroptosis induction, including mitogen-  
475 activated protein kinases (MAPK) and reactive oxygen species (Ros) pathways [37]. Hence,  
476 targeting upstream genes (e.g., MAP2K2, EGLN2) along with downstream genes (e.g., TFRC,  
477 FTL) might lead to a synergistic effect.

478

479 **Table 2. Analysis of overall survival among the nine top-ranked target combinations in**  
480 **pancreatic ductal adenocarcinoma (PDAC)**

481

## 482 **Performance of DSCNi in predicting drug synergy in cancer cell lines**

483 DSCNi predicts target combinations for individual patients using gene-expression and -  
484 essentiality profiles. In this study, we assessed whether DSCNi predicted any association  
485 between target- and drug-combination synergy at each individual cell-line level. DrugComb  
486 [30] is a comprehensive database that incorporates information regarding the synergy of drug  
487 combinations from numerous well-known projects, such as the National Cancer Institute  
488 (NCI)-60 [38] for Human Tumor Cell Lines Screen. Because DrugComb includes only one  
489 PDAC cell line with five associated combinational drug treatments, we decided to use the cell-  
490 line data of triple-negative breast cancer (TNBC). We used 115 TNBC expression profiles from  
491 TCGA to generate edge weights in the tissue-function network, 12 TNBC cell lines from the  
492 Cancer Cell Line Encyclopedia (CCLE) database [39] to generate edge weights for the cell-  
493 line function network, and CRISPR screening data of the TNBC cell line “HS578T” from Project  
494 Achilles to generate node weights in the cell-line function network. Among all TNBC cell-lines,  
495 HS578T has the largest number (N = 5,226) of drug-combination screening data in the  
496 DrugComb database, and our focus on drugs with known targets in DrugBank led to screening  
497 data for 1,031 drug combinations in the HS578T cell line.) In turn, these drug combinations  
498 correspond with 14,066 target combinations in our network model (**Supplementary File 2**).

499

500 To measure the association between predicted synthetic lethal pairs and synergistic drug  
501 combinations, we constructed a 2 by 2 contingency table (Table 3), in which rows correspond  
502 with drug-combination synergy (Y/N), and columns, with target-combination synergy (Y/N).  
503 Among synergistic drug combinations, synergy is predicted in 2,594 of their corresponding

504 target combinations with DSCNi, but not in the other 7,097. Neither is synergy predicted in  
505 any of the other non-synergistic drug combinations in iDSCN. The  $P$ -value of the chi-squared  
506 test is 0.00001, and the odds ratio is 1,599. This is strong evidence of the greater likelihood  
507 that synergistic drug combinations have synergistic target combinations.

508

509 **Table 3. Contingency table between drug- and target-combination synergy**

510

## 511 **Discussion**

512 Our new DSCN method, double target selection guided by CRISPR screening and network,  
513 uses both cancer tissue and cell-line models to discover and rank target combinations, and it  
514 has several unique features and advantages in comparison with existing methods of selecting  
515 combination targets.

516

517 For the first time, DSCN uses a subsampling approach that characterizes the knockdown of  
518 the first target and models its impact on all the other genes. To demonstrate the validity of this  
519 assumption, we studied a set of transcriptome profiles across 22 pancreatic cell lines before  
520 and after MAP2K1 and MAP2K2 inhibition. Among 1,301 neighbor genes of MAP2K1 and  
521 MAP2K2 in the PPI network, our analysis revealed high correlation of observed log-fold  
522 changes in these genes before and after MAP2K1 and MAP2K2 inhibition with log-fold  
523 changes calculated from the sub-sampling approach,  $R^2 = 0.75$ .

524

525 DSCN also differs from all other methods by focusing on the overlapped functional network



526 between cancer tissues and cell lines and further matching the differential gene expression in  
527 the tissue to gene essentialities in the cell line. This framework for the selection of target  
528 combinations is highly translational and practical. We investigated a number of scoring  
529 schemes for calculating impact score, including the most-probable paths, random-walk paths,  
530 and diffusion paths, and we studied whether the global network and spectrum clustering-based  
531 local network lead to different calculations of impact score. Using tumor samples of pancreatic  
532 cancer and cell-line samples and known synthetic lethal data in SynlethDB, we showed  
533 statistically significant lower impact scores of target combinations in synthetic lethal gene pairs  
534 than other target pairs utilizing a diffusion-path approach on the local network. This analysis  
535 clearly demonstrates the validity of our proposed algorithm for calculating the impact scores  
536 of target combinations that reflect synthetic lethality.

537

538 Furthermore, DSCN is broadly defined for every target and target combination, unlike existing  
539 network-based target selection algorithms, such as OptiCon[1] or VIPER [2], that are limited  
540 by their initial step in the selection of single targets (i.e., master regulators). This advantage of  
541 DSCN is demonstrated in the analysis of overlap among the the top-ranked target pairs  
542 between DSCN, Opticon, and VIPER and synthetic lethal target pairs reported in the analysis  
543 of pancreatic cancer data in SynlethDB. DSCN identified 79 overlapped synthetic lethal target  
544 combinations, whereas OptiCon and VIPER showed zero overlap. In addition, three of these  
545 top nine predicted synergistic target combinations in pancreatic cancer show statistically  
546 significant association with overall survival in patients with pancreatic cancer, and all three  
547 contain the TRFC gene, which encodes a surface receptor for cellular iron intake. Hence, the

548 targeting of upstream genes (e.g., MAP2K2, EGLN2) along with downstream genes (e.g., FTL)

549 might lead to a synergistic effect.

550

551 Finally, we investigate two relevant but different concepts, drug- and target-combination

552 synergy, hypothesizing the greater likelihood of synergistic than non-synergistic drug

553 combinations to target more synergistic target combinations. Using DSCNi, a model derived

554 from DSCN for the prediction of target combinations for individual patients, we showed the

555 truth of our hypothesis using triple-negative breast-cancer tissue and cell-line data. Based on

556 1,031 drug combination screening data in HS578T, a TNBC cell line, and its corresponding

557 14,067 DSCNi-predicted target combination synergy scores, we showed the 1,599-fold higher

558 odds of synergistic than non-synergistic drug combinations to predict synergistic target

559 combinations ( $P = 0.00001$ ).

## 560 **Author's contributions**

561 Enze Liu executed the study. Lei Wang, Xue Wu, Yang Huo and Huanmei Wu provided

562 technical support and valuable comments to the study. Lang Li and Lijun Cheng designed

563 the study.

## 564 **Code availability**

565 The python programming was used to implement and train all models. The training and

566 validation datasets used to create each model are available as part of the experimental dataset

567 released as described in materials. The code required to construct the training and validation

568 dataset data and also to analyze the experimental data is provided for download  
569 (<https://github.com/tzcoolman/DSCN>).

570

## 571 References

- 572 1. Hu, Y., et al., *Optimal control nodes in disease-perturbed networks as targets for combination*  
573 *therapy*. Nature communications, 2019. **10**(1): p. 1-14.
- 574 2. Alvarez, M.J., et al., *Functional characterization of somatic mutations in cancer using network-*  
575 *based inference of protein activity*. Nature genetics, 2016. **48**(8): p. 838.
- 576 3. Parhi, P., C. Mohanty, and S.K. Sahoo, *Nanotechnology-based combinational drug delivery:*  
577 *an emerging approach for cancer therapy*. Drug discovery today, 2012. **17**(17-18): p. 1044-  
578 1052.
- 579 4. Al-Lazikani, B., U. Banerji, and P.J.N.b. Workman, *Combinatorial drug therapy for cancer in the*  
580 *post-genomic era*. 2012. **30**(7): p. 679-692.
- 581 5. Hammer, S.M., et al., *Treatment for adult HIV infection: 2006 recommendations of the*  
582 *International AIDS Society–USA panel*. 2006. **296**(7): p. 827-843.
- 583 6. Stephenson, D., et al., *Charting a path toward combination therapy for Alzheimer's disease*.  
584 2015. **15**(1): p. 107-113.
- 585 7. Ryan, C.J., I. Bajrami, and C.J.J.T.i.c. Lord, *Synthetic lethality and cancer–penetrance as the*  
586 *major barrier*. 2018. **4**(10): p. 671-683.
- 587 8. Shen, J.P., et al., *Combinatorial CRISPR–Cas9 screens for de novo mapping of genetic*  
588 *interactions*. 2017. **14**(6): p. 573-576.
- 589 9. Han, K., et al., *Synergistic drug combinations for cancer identified in a CRISPR screen for*  
590 *pairwise genetic interactions*. 2017. **35**(5): p. 463.
- 591 10. Tong, A.H.Y., et al., *Global mapping of the yeast genetic interaction network*. 2004. **303**(5659):  
592 p. 808-813.
- 593 11. Wong, S.L., et al., *Combining biological networks to predict genetic interactions*. 2004. **101**(44):  
594 p. 15682-15687.
- 595 12. Benstead-Hume, G., et al., *Predicting synthetic lethal interactions using conserved patterns in*  
596 *protein interaction networks*. 2019. **15**(4): p. e1006888.
- 597 13. Pandey, G., et al., *An integrative multi-network and multi-classifier approach to predict genetic*  
598 *interactions*. 2010. **6**(9): p. e1000928.
- 599 14. Cho, H., B. Berger, and J.J.C.s. Peng, *Compact integration of multi-network topology for*  
600 *functional analysis of genes*. 2016. **3**(6): p. 540-548. e5.
- 601 15. Liany, H., A. Jeyasekharan, and V.J.B. Rajan, *Predicting synthetic lethal interactions using*  
602 *heterogeneous data sources*. 2020. **36**(7): p. 2209-2216.
- 603 16. Jerby-Arnon, L., et al., *Predicting cancer-specific vulnerability via data-driven detection of*  
604 *synthetic lethality*. 2014. **158**(5): p. 1199-1209.
- 605 17. Sinha, S., et al., *Systematic discovery of mutation-specific synthetic lethals by mining pan-*

- 606 *cancer human primary tumor data*. 2017. **8**(1): p. 1-13.
- 607 18. Lee, J.S., et al., *Harnessing synthetic lethality to predict the response to cancer treatment*. 2018.
- 608 **9**(1): p. 1-12.
- 609 19. Tamada, K., et al., *Redirecting gene-modified T cells toward various cancer types using tagged*
- 610 *antibodies*. Clin Cancer Res, 2012. **18**(23): p. 6436-45.
- 611 20. Liang, H., A. Jeyasekharan, and V.J.b. Rajan, *ASTER: A Method to Predict Clinically Actionable*
- 612 *Synthetic Lethal Interactions*. 2020.
- 613 21. Liu, E., et al., *SCNrank: spectral clustering for network-based ranking to reveal potential drug*
- 614 *targets and its application in pancreatic ductal adenocarcinoma*. 2020. **13**: p. 1-15.
- 615 22. Edgar, R., M. Domrachev, and A.E.J.N.a.r. Lash, *Gene Expression Omnibus: NCBI gene*
- 616 *expression and hybridization array data repository*. 2002. **30**(1): p. 207-210.
- 617 23. Barrett, T., et al., *NCBI GEO: archive for functional genomics data sets—update*. 2012. **41**(D1):
- 618 p. D991-D995.
- 619 24. Tomczak, K., P. Czerwińska, and M.J.C.o. Wiznerowicz, *The Cancer Genome Atlas (TCGA):*
- 620 *an immeasurable source of knowledge*. 2015. **19**(1A): p. A68.
- 621 25. Tsherniak, A., et al., *Defining a Cancer Dependency Map*. Cell, 2017. **170**(3): p. 564-576 e16.
- 622 26. Aguirre, A.J., et al., *Genomic Copy Number Dictates a Gene-Independent Cell Response to*
- 623 *CRISPR/Cas9 Targeting*. Cancer Discov, 2016. **6**(8): p. 914-29.
- 624 27. Cowley, G.S., et al., *Parallel genome-scale loss of function screens in 216 cancer cell lines for*
- 625 *the identification of context-specific genetic dependencies*. Sci Data, 2014. **1**: p. 140035.
- 626 28. Szklarczyk, D., et al., *The STRING database in 2017: quality-controlled protein-protein*
- 627 *association networks, made broadly accessible*. Nucleic Acids Res, 2017. **45**(D1): p. D362-
- 628 D368.
- 629 29. Guo, J., H. Liu, and J. Zheng, *SynLethDB: synthetic lethality database toward discovery of*
- 630 *selective and sensitive anticancer drug targets*. Nucleic acids research, 2016. **44**(D1): p.
- 631 D1011-D1017.
- 632 30. Zagidullin, B., et al., *DrugComb: an integrative cancer drug combination data portal*. 2019.
- 633 **47**(W1): p. W43-W51.
- 634 31. Wishart, D.S., et al., *DrugBank 5.0: a major update to the DrugBank database for 2018*. Nucleic
- 635 *Acids Res*, 2018. **46**(D1): p. D1074-D1082.
- 636 32. Borisy, A.A., et al., *Systematic discovery of multicomponent therapeutics*. Proceedings of the
- 637 *National Academy of Sciences*, 2003. **100**(13): p. 7977-7982.
- 638 33. O'Neil, J., et al., *An unbiased oncology compound screen to identify novel combination*
- 639 *strategies*. Molecular cancer therapeutics, 2016. **15**(6): p. 1155-1162.
- 640 34. Margolin, A.A., et al. *ARACNE: an algorithm for the reconstruction of gene regulatory networks*
- 641 *in a mammalian cellular context*. in *BMC bioinformatics*. 2006. Springer.
- 642 35. Tang, Z., et al., *GEPIA: a web server for cancer and normal gene expression profiling and*
- 643 *interactive analyses*. 2017. **45**(W1): p. W98-W102.
- 644 36. Jeong, S.M., S. Hwang, and R.H. Seong, *Transferrin receptor regulates pancreatic cancer*
- 645 *growth by modulating mitochondrial respiration and ROS generation*. Biochemical and
- 646 *biophysical research communications*, 2016. **471**(3): p. 373-379.
- 647 37. Xie, Y., et al., *Ferroptosis: process and function*. Cell Death & Differentiation, 2016. **23**(3): p.
- 648 369-379.
- 649 38. Shoemaker, R.H.J.N.R.C., *The NCI60 human tumour cell line anticancer drug screen*. 2006.

650           **6**(10): p. 813-823.

651    39.    Barretina, J., et al., *The Cancer Cell Line Encyclopedia enables predictive modelling of*  
652           *anticancer drug sensitivity*. 2012. **483**(7391): p. 603-607.

653

654

655 **TABLE LEGENDS**

656 **Table 1.** Datasets used in this study

657 **Table 2.** Analysis of overall survival among the nine top-ranked target combinations in  
658 pancreatic ductal adenocarcinoma (PDAC)

659 **Table 3.** Contingency table between drug- and target-combination synergy

660

661 **FIGURES LEGENDS**

662 **Figure 1.** Overview of double-target selection guided by CRISPR screening and network  
663 (DSCN).

664 **Figure 2.** Network configurations for three methods to calculate impact score.

665 **Figure 3.** Correlation between the predicted and observed log-fold changes in gene  
666 expression among MAP2K1 and MAP2K2 neighbor genes in the protein-protein interaction  
667 (PPI) network.

668 **Figure 4.** Comparison of target-combination impact scores using synthetic versus non-  
669 synthetic lethal gene pairs in pancreatic cancer.

670 **Figure 5.** Kaplan-Meier curves for the nine top-ranked target combinations (a)-(i).

671

**Table 1.** Datasets used in this study.

| <b>Part 1. Multi-omics data</b>           |                            |                                                                                                            |                                                                                                    |
|-------------------------------------------|----------------------------|------------------------------------------------------------------------------------------------------------|----------------------------------------------------------------------------------------------------|
| <b>Cancer type</b>                        | <b>Data platform</b>       | <b>Data type</b>                                                                                           | <b>Data (n, sample size)</b>                                                                       |
| Pancreatic cancer cell lines              | Affymetrix U133 2.0        | Gene expression                                                                                            | GSE36133 (43), GSE46385 (7), GSE21654 (22), GSE17891 (20)<br>Total sample size = 92                |
|                                           | CRISPR screening           | Gene essentiality                                                                                          | Project Achilles (v3.3.8)<br>Total sample size = 26                                                |
| Pancreatic tissue samples                 | Affymetrix U133 2.0        | Gene expression (tumor)                                                                                    | GSE42952 (33), GSE51978 (2), GSE16515 (36), GSE15471 (39), GSE23952 (3)<br>Total sample size = 113 |
|                                           | Affymetrix U133 2.0        | Gene expression (normal)                                                                                   | GSE46385 (3), GSE16515 (16), GSE15471 (39)<br>Total sample size = 58                               |
|                                           | Illumina DNA-seq & RNA-seq | Mutation and gene expression (tumor)                                                                       | TCGA ductal and lobular neoplasms (150), adenomas and adenocarcinomas (29)                         |
|                                           | Illumina RNA-seq           | Gene expression (normal)                                                                                   | Solid tissue adjacent normal (41)                                                                  |
| Breast cancer tissue samples              | RNA-seq                    | Gene expression (tumor)                                                                                    | TCGA triple negative breast cancer sample (115)                                                    |
|                                           |                            | Gene expression (normal)                                                                                   | TCGA triple negative breast cancer sample (163)                                                    |
| Breast cancer cell lines                  | Affymetrix U133 2.0        | Gene expression                                                                                            | GSE36133 (12)                                                                                      |
|                                           | CRISPR Screening           | Gene essentiality                                                                                          | Project Achilles (v3.3.8)<br>Total sample size = 28                                                |
| <b>Part 2. Databases</b>                  |                            |                                                                                                            |                                                                                                    |
| <b>Data type</b>                          | <b>Database</b>            | <b>Data</b>                                                                                                |                                                                                                    |
| Protein-protein interaction (PPI) network | STRING[28]                 | PPI data in STRING database for human (v11): 11,609,230 interactions                                       |                                                                                                    |
| Drug targets                              | DrugBank[31]               | Food and Drug Administration (FDA)-approved drugs and their associated target proteins: 1,769 gene targets |                                                                                                    |
| Synthetic lethal pairs                    | SynlethDB[29]              | 19,613 synthetic lethal gene pairs in human cancer                                                         |                                                                                                    |
| Drug sensitivity data                     | DrugComb[30]               | Drug synergies among cell lines on 5,226 drug pairs (HS5)                                                  |                                                                                                    |

672

673

**Table 2.** Analysis of overall survival among the nine top-ranked target combinations in pancreatic ductal adenocarcinoma (PDAC).

| Gene 1 | Gene 2 | Impact score | Log rank P-value | Hazard Ratio (HR) | HR P-value | Pathways                        |
|--------|--------|--------------|------------------|-------------------|------------|---------------------------------|
| EGLN1  | TFRC   | -255.12      | 0.02             | 2.00              | 0.02       | hypoxia, ferroptosis            |
| MAP2K2 | TFRC   | -255.05      | 0.08             | 1.60              | 0.08       | MAPK, ferroptosis               |
| HPSE   | TFRC   | -255.01      | 0.19             | 1.50              | 0.20       | Metabolism, ferroptosis         |
| PPIC   | TFRC   | -254.86      | 0.06             | 1.80              | 0.06       | Immune system, ferroptosis      |
| FRK    | TFRC   | -254.86      | 0.04             | 1.80              | 0.05       | Immune system, ferroptosis      |
| EGLN1  | COX7C  | -254.79      | 0.84             | 1.10              | 0.85       | Hypoxia, metabolism             |
| XDH    | TFRC   | -254.75      | 0.001            | 2.40              | 0.002      | Metabolism, ferroptosis         |
| MAP2K2 | COX7C  | -254.72      | 0.14             | 0.65              | 0.15       | MAPK, oxidative phosphorylation |
| FTL    | TFRC   | -254.71      | 0.10             | 1.60              | 0.10       | ferroptosis, ferroptosis        |

674  
675  
676



**Table 3.** Contingency table between drug- and target-combination synergy.

|                              | Predicted target-combination synergy | Predicted target-combination non-synergy |
|------------------------------|--------------------------------------|------------------------------------------|
| Drug-combination synergy     | 2,594                                | 7,097                                    |
| Drug-combination non-synergy | 0                                    | 4,375                                    |

677

678

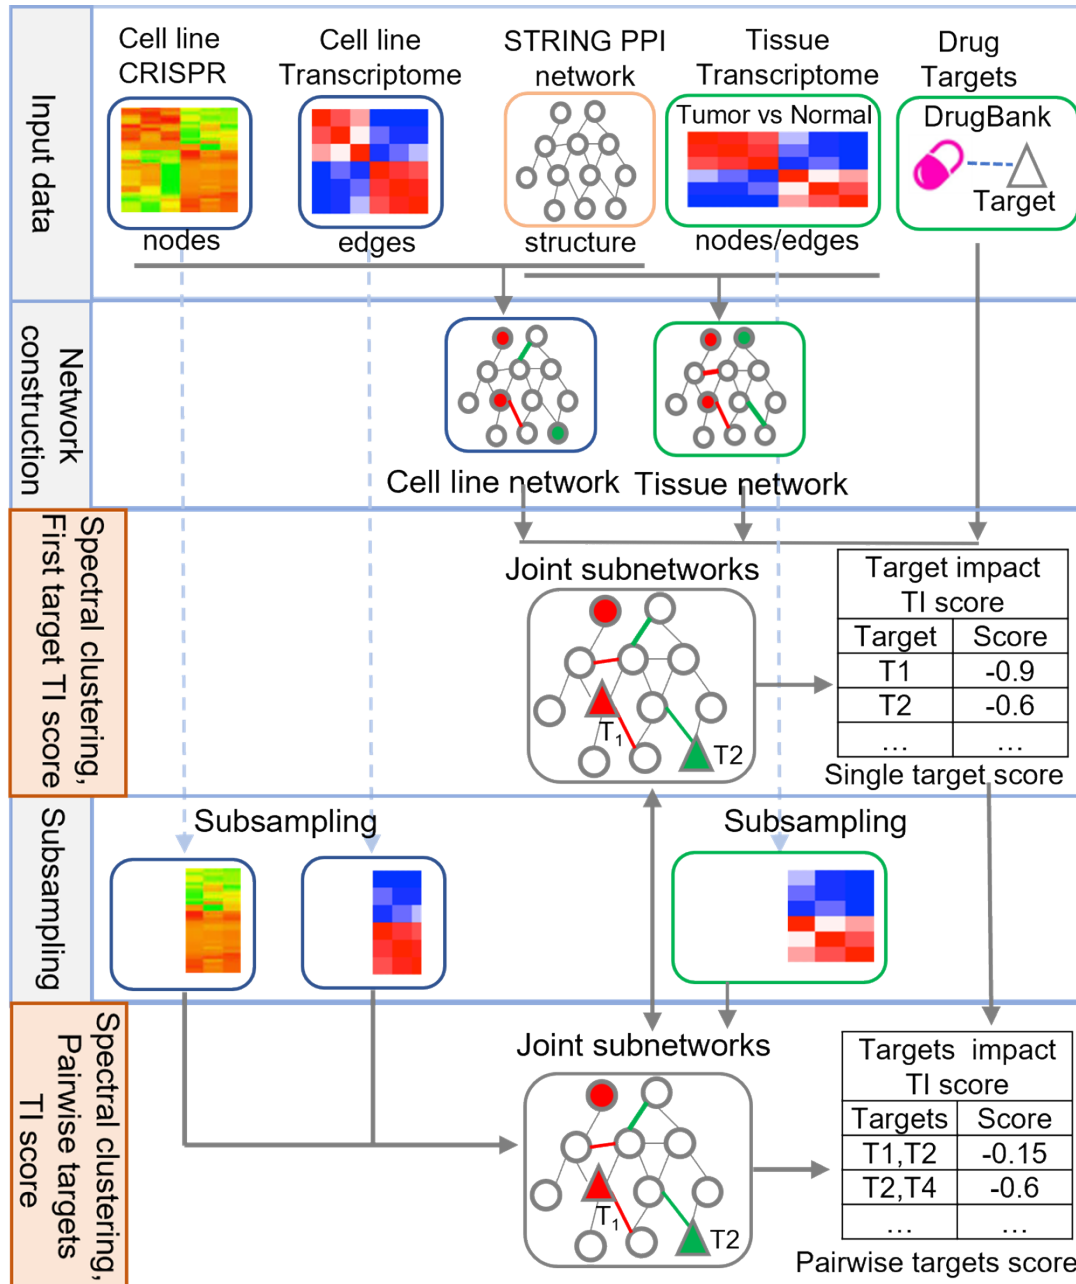

679 **Figure 1.** Overview of double-target selection guided by CRISPR screening and network  
 680 (DSCN).

681

682

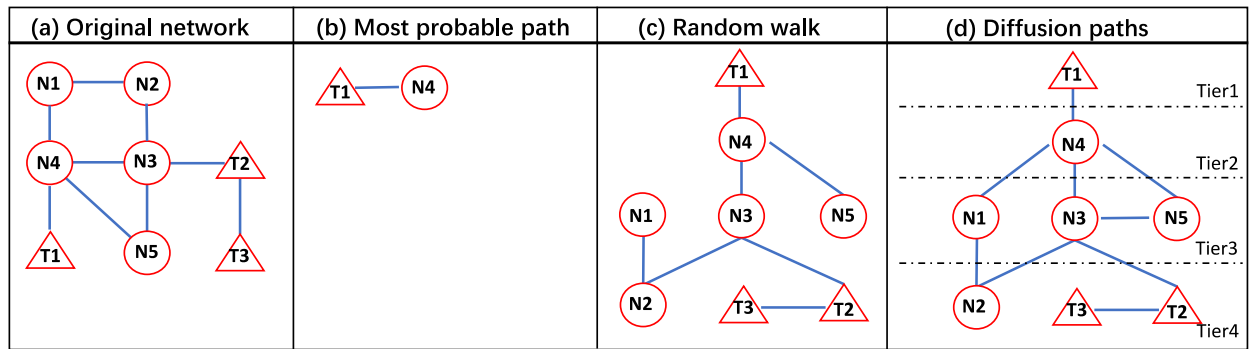

Note: (a) Original network. (b) Most-probable path for  $T1$ . (c) Random-walk path from  $T1$ . (d) Diffusion path in four hierarchical tiers.

683

684

**Figure 2.** Network configurations for three methods to calculate impact score.

685

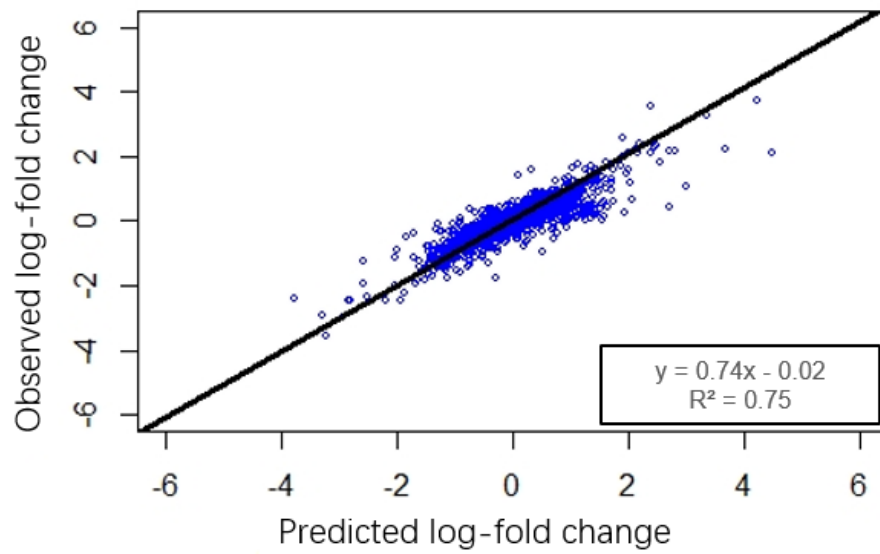

686

687

688

689

**Figure 3.** Correlation between the predicted and observed log-fold changes in gene expression among MAP2K1 and MAP2K2 neighbor genes in the protein-protein interaction (PPI) network.

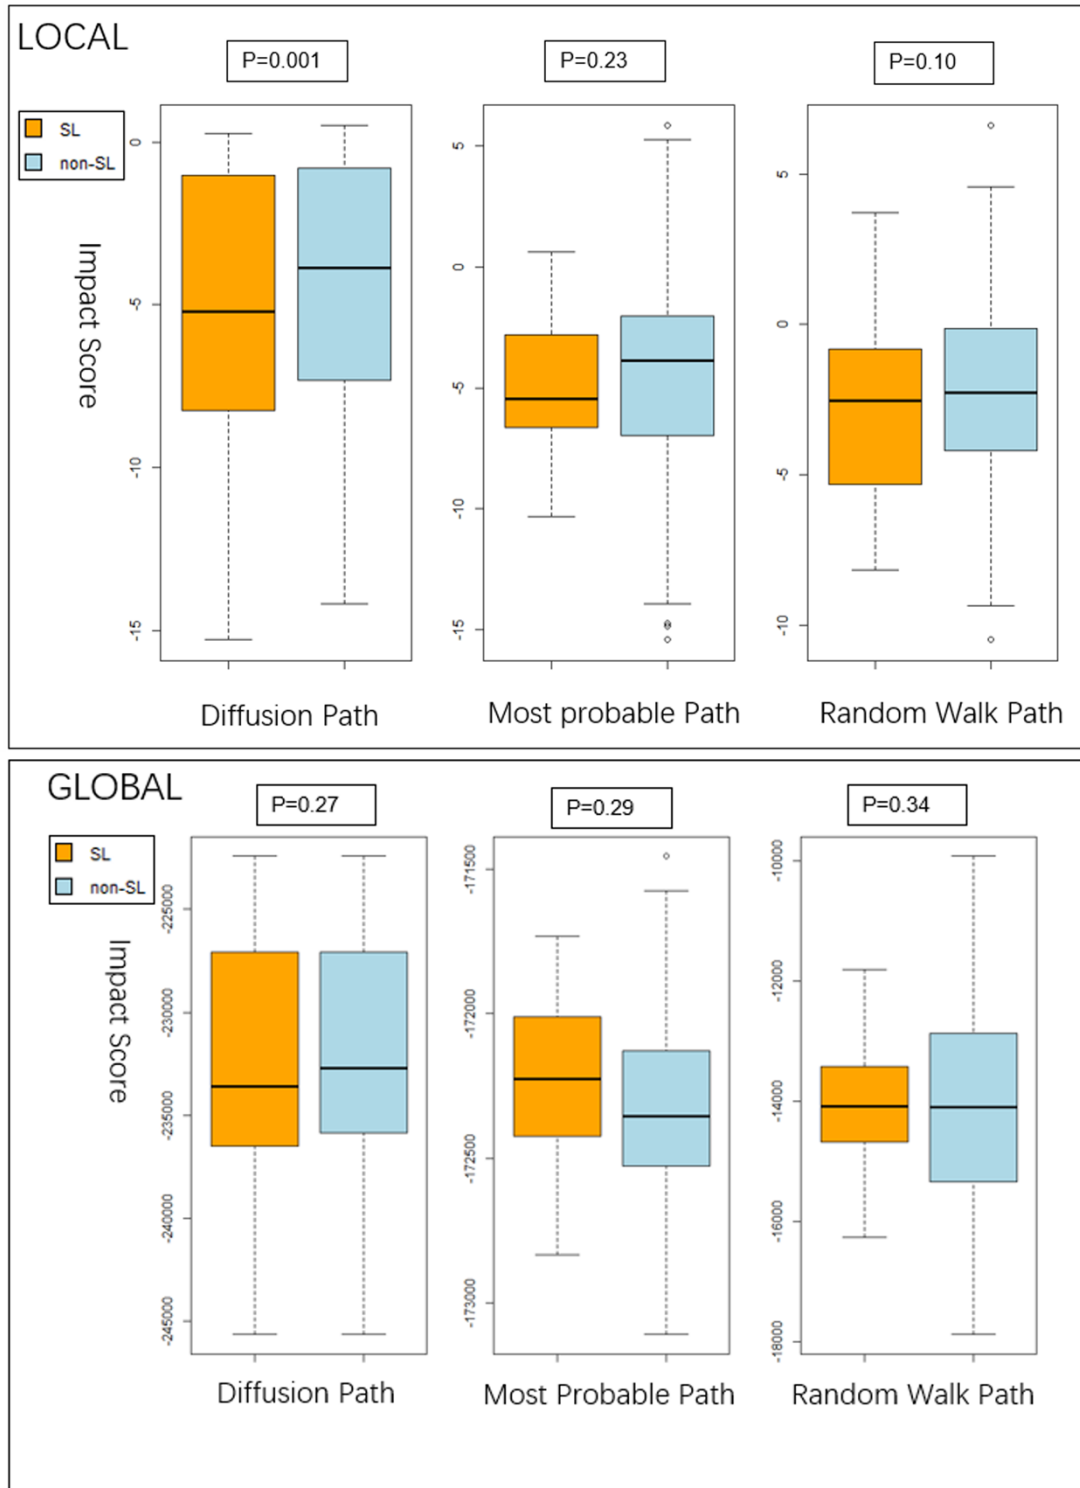

690

691 **Figure 4.** Comparison of target-combination impact scores using synthetic versus non-  
692 synthetic lethal gene pairs in pancreatic cancer. The three methods for calculating impact  
693 score—the most-probable, random-walk, and diffusion paths are defined in **Figure 2**. The  
694 impact scores (IS) are calculated from either the global protein-protein interaction (PPI)  
695 network (global) or the local PPI network (local).

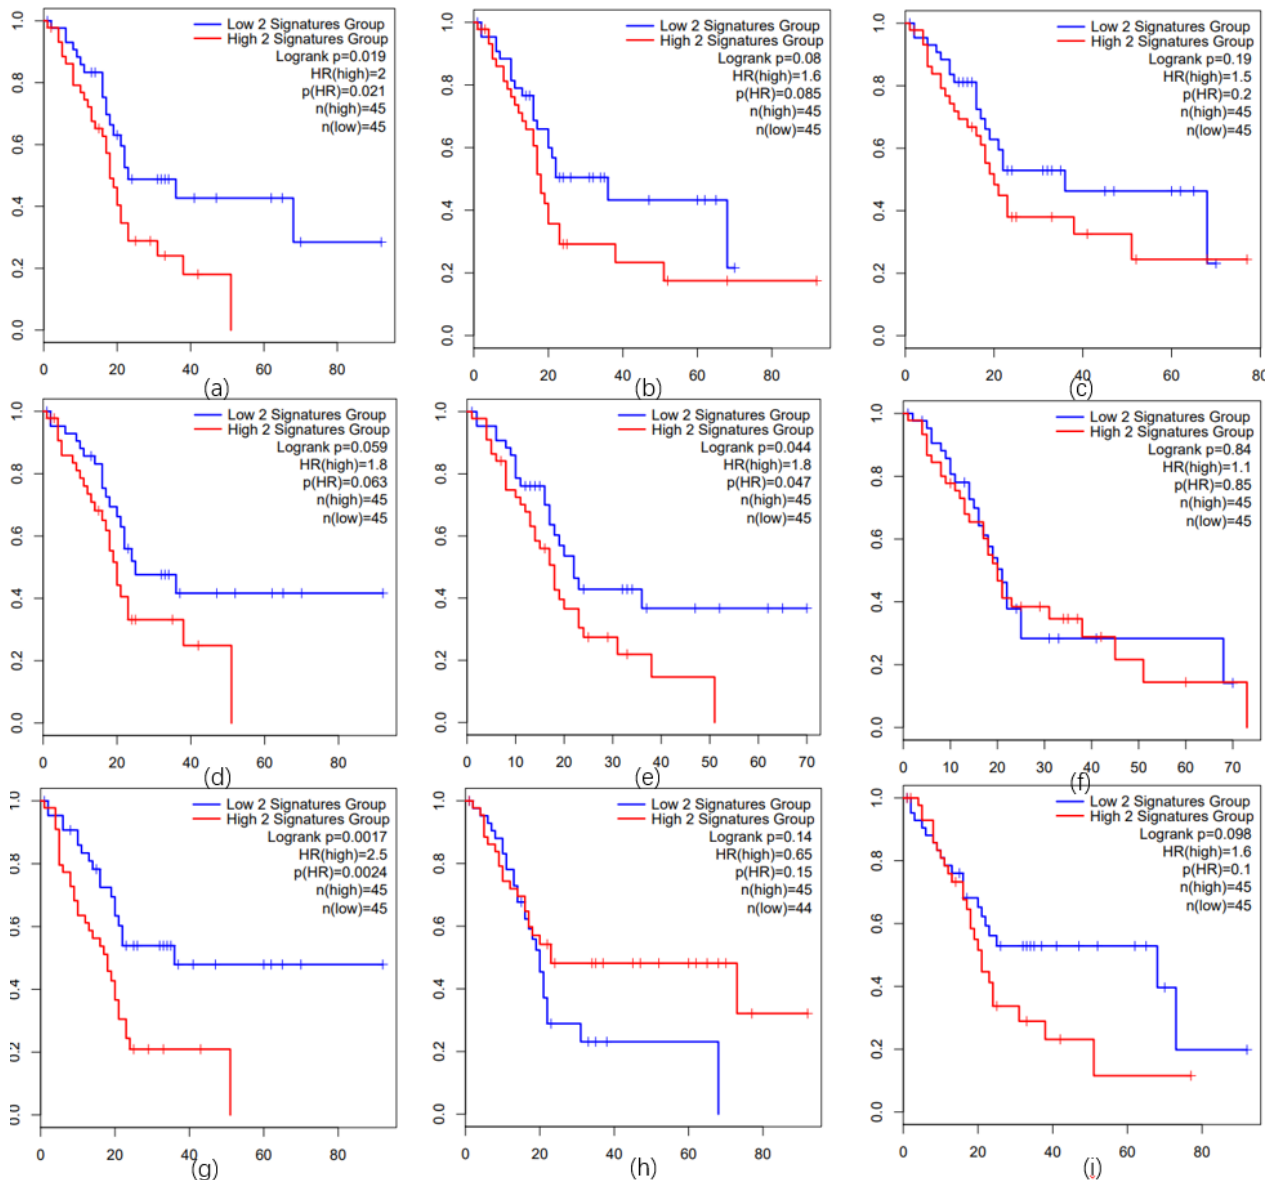

696

697 **Figure 5.** Kaplan-Meier curves for the nine top-ranked target combinations (a)-(i). Kaplan-  
 698 Meier curves and other survival statistics for (a) < EGLN1, TRFC>, (b) < MAP2K2, TRFC>,  
 699 (c) < HPSE, TRFC>, (d) < PPIC, TRFC>, (e) < FRK, TRFC>, (f) < EGLN1, COX7C>, (g) <  
 700 XDH, TRFC>, (h) < MAP2K2, COX7C>, and (i) < FTL, TRFC>. Y-axis indicates survival  
 701 probability while X-axis indicates months. The blue line in each plot indicates low expression  
 702 of the two gene groups, and the red line, high expression.

703
